# Supplementary material
Source: PubMed Central journal article supplement (PMC6949382)
Supplement: NIHMS1539176-supplement-2.pdf [file NIHMS1539176-supplement-2.pdf]

**Figure S1. Dynamic *in vivo* HP MRSI of prostate cancer patients. Related to Figure 1 and Figure 2**

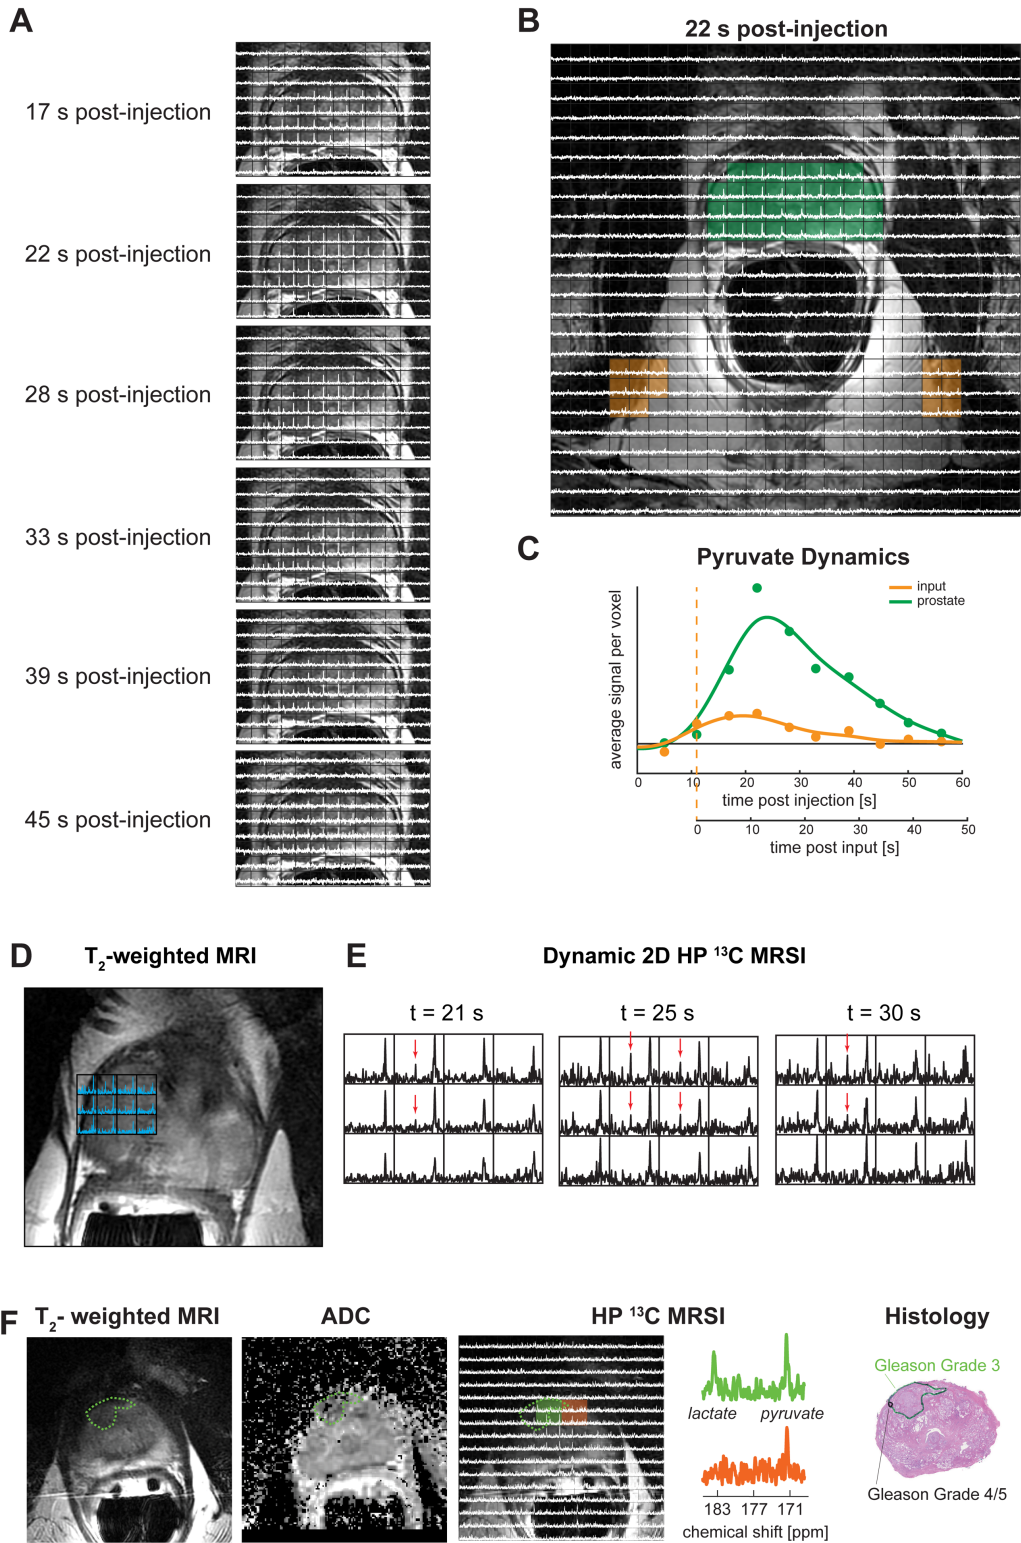

**Figure S1. Dynamic *in vivo* HP MRSI of prostate cancer patients. Related to Figure 1 and Figure 2** (A) Spectra are shown overlaid on a T<sub>2</sub>-weighted image for various time points corresponding to the data shown in Fig. 2. Pyruvate and lactate signal is localized in the prostate. The first time point (17 s post-injection) shows pyruvate delivery to the prostate. The maximum lactate ratio occurs at 33 s post-injection. (B) 2D overlay highlighting the prostate and input function voxels. (C) Arterial Input Correction. Pyruvate dynamics for the input function and the prostate. The first time point with a signal in the input is used to correct the timing of the dynamics, denoted time post input. (D) Representative T<sub>2</sub>-weighted MRI and multiple voxels of <sup>13</sup>C data highlighting the region of interest in a patient with Gleason 4/5 prostate cancer. (E) **Detection of a HP bicarbonate in a region of prostate cancer.** Dynamic time points of the HP data at 21-30s post-injection. The resonance annotated by the red arrow corresponds to the aliased location of bicarbonate. (F) **Apical Tumor** The tumor region (dotted red outline) is shown on the T<sub>2</sub>-weighted image and ADC map. Voxels with high lactate signal are shown in red overlaid on the T<sub>2</sub>-weighted image. Voxels from the contralateral side are shown in green. Composite spectra from the two regions are also shown. The lesion is not conspicuous on the conventional images, but the region of high lactate corresponds to the tumor region on step-section pathology.

**Figure S2.** Clinical, pathologic and biochemical data correlations. **Related to Figure 3**

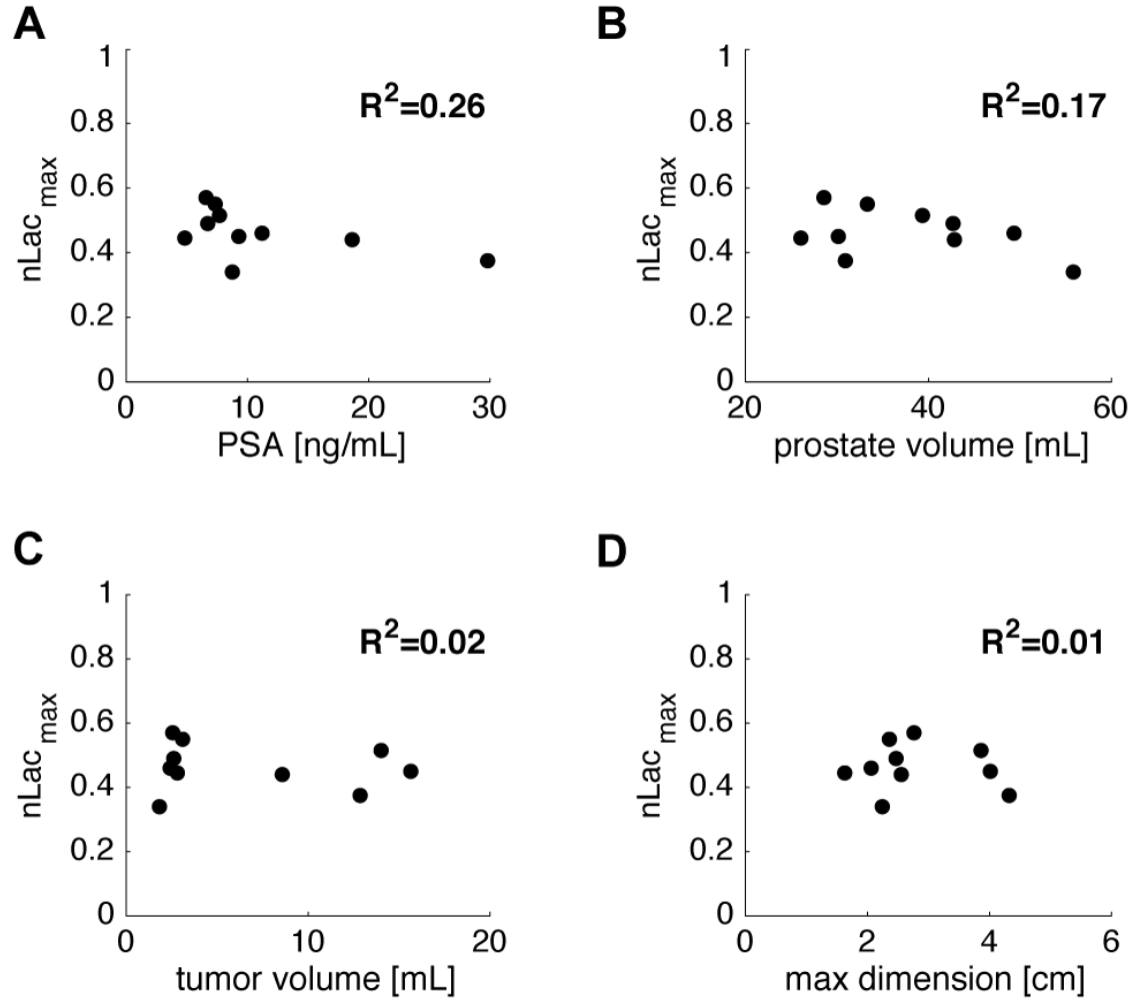

**Figure S2. Clinical, pathologic and biochemical data correlations. Related to Figure 3** The maximum normalized lactate in a tumor region is weakly correlated with various clinical parameters, including (A) serum prostate-specific antigen, (B) prostate volume, (C) total tumor volume, and (D) maximum tumor dimension.

**Figure S3. Gene expression data of LDH isoenzymes and MCT1/4 across tumor and normal prostate samples. Related to Figure 4**

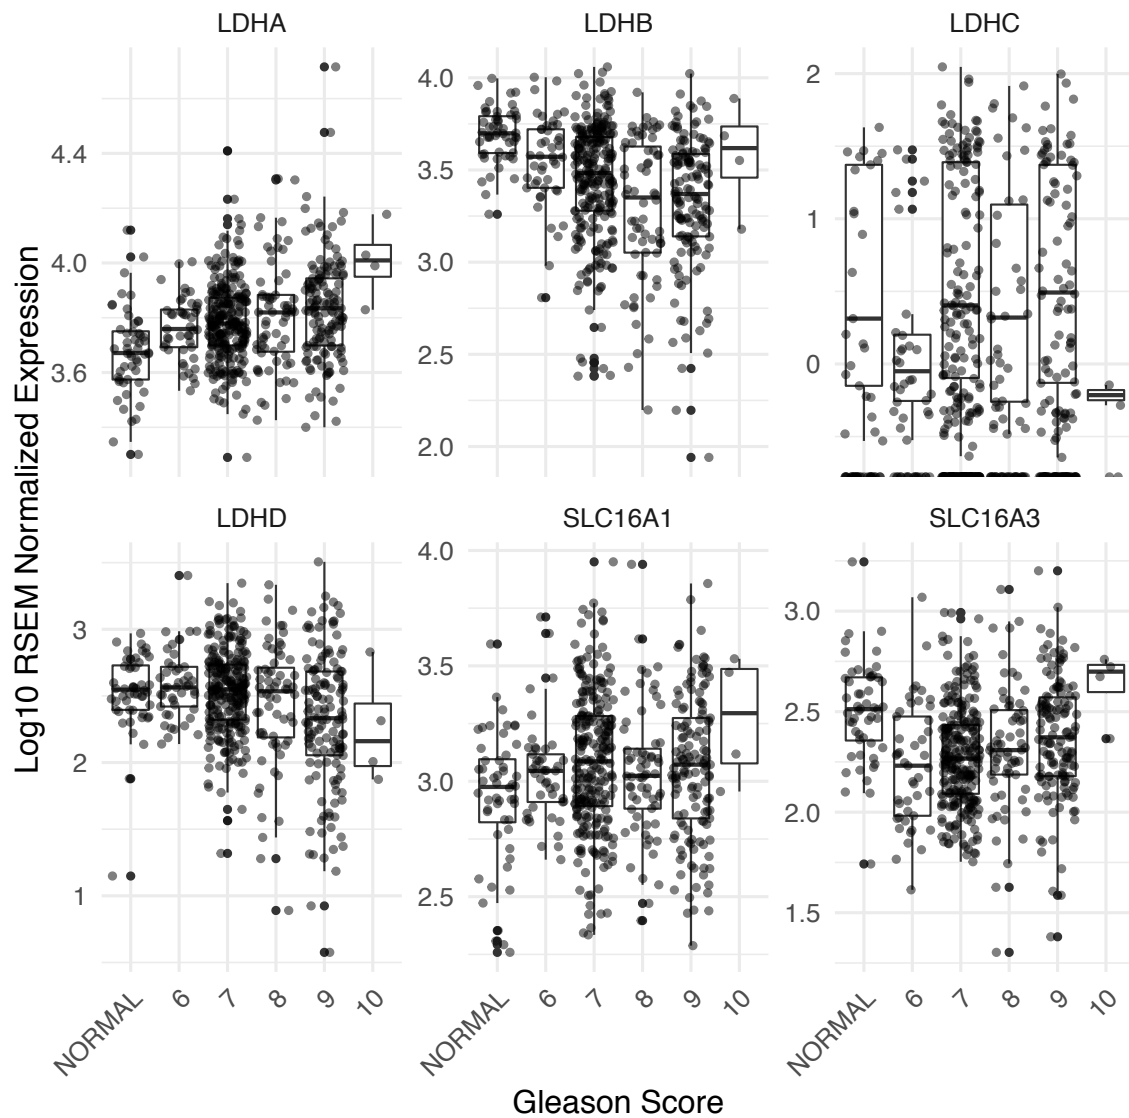

**Figure S3. Gene expression data of LDH isoenzymes and MCT1/4 across tumor and normal prostate samples. Related to Figure 4** The expression of LDHA and MCT1 (SLC16A1) is elevated in tumors compared to normal tissue, and is further elevated in high Gleason grade tumors. Gleason score is determined as the sum of the primary and second Gleason grade.

**Figure S4. Allele-specific copy number analysis indicates PTEN deletion in a subset of samples. Related to Figure 4**

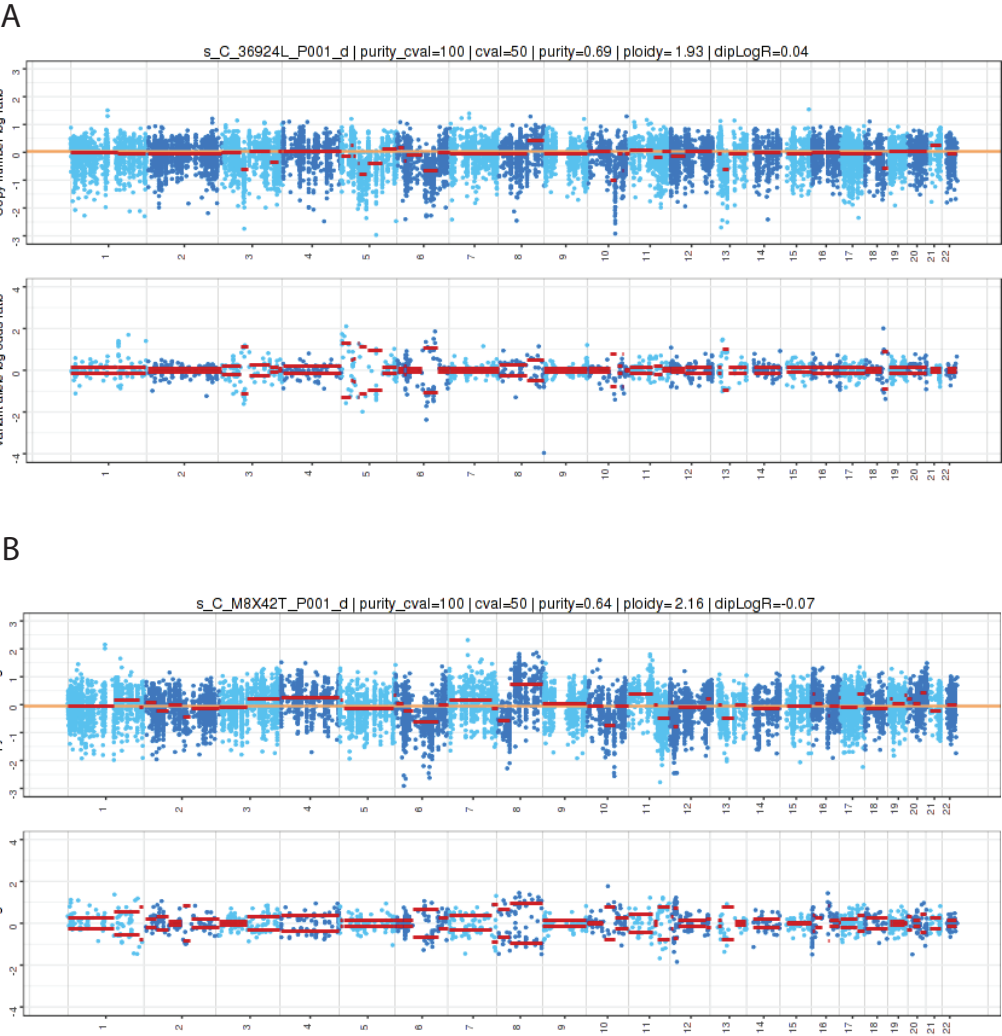

**Figure S4. Allele-specific copy number analysis indicates PTEN deletion in a subset of samples. Related to Figure 4** Depicted are two cases demonstrating deep (homozygous) deletion of the *PTEN* locus on chromosome 10q.

**Table S1. Patient Overview. Related to STAR Methods Experimental Model and Subject Details**

| Patient | Number of injections | Age at HP MRI | PSA [ng/mL] | Dominant prostatectomy Gleason Score | Tumor volume (G3/G4+) [cm <sup>3</sup> ] | Time since biopsy [days] | Time to prostatectomy [days] |
|---------|----------------------|---------------|-------------|--------------------------------------|------------------------------------------|--------------------------|------------------------------|
| 1       | 2                    | 69            | 11.2        | 4                                    | 0.26/2.15                                | 36                       | 29                           |
| 2       | 2                    | 51            | 9.28        | 4                                    | 0.02/15.63                               | 65                       | 228                          |
| 3       | 1                    | 72            | 6.05        | N/A                                  | N/A                                      | 70                       | N/A                          |
| 4       | 1                    | 57            | 8.75        | 3                                    | 1.79/0.03                                | 108                      | 18                           |
| 5       | 1                    | 68            | 18.63       | 4                                    | 0.13/8.45                                | 60                       | 6                            |
| 6       | 1                    | 55            | 6.58        | 4                                    | <0.01/2.55                               | 50                       | 11                           |
| 7       | 2                    | 66            | 4.83        | 3                                    | 2.71/0.10                                | 81                       | 6                            |
| 8       | 1                    | 62            | 4.92        | 3                                    | 0.47/0.34                                | 95                       | 6                            |
| 9       | 1                    | 62            | 6.72        | 3                                    | 2.32/0.29                                | 82                       | 2                            |
| 10      | 2                    | 66            | 7.34        | 4                                    | 0.54/2.6                                 | 111                      | 29                           |
| 11      | 2                    | 51            | 29.8        | 4                                    | 0.09/12.77                               | 38                       | 3                            |
| 12      | 2                    | 60            | 7.69        | 4                                    | 13.4/0.63                                | 102                      | 1                            |
| Mean    |                      | 62            | 10.1        |                                      | 0.87/4.70                                | 75                       | 31                           |
| SD      |                      | 7             | 7.2         |                                      | 1.09/6.03                                | 26                       | 66                           |

**Table S2. Dose Overview Related to STAR Methods Method Details**

| <b>Dose</b> | <b>Patient</b> | <b>Pyruvate concentration [mM]</b> | <b>pH</b> | <b>EPA concentration [mM]</b> | <b>Temperature [° C]</b> | <b>Time to injection [s]</b> | <b>Dose volume [mL]</b> | <b>Polarization [%]</b> | <b>Polarization time [min]</b> |
|-------------|----------------|------------------------------------|-----------|-------------------------------|--------------------------|------------------------------|-------------------------|-------------------------|--------------------------------|
| 1           | 1              | 244                                | 7.3       | 3.3                           | 35.9                     | 59.8                         | 32                      | 10.7                    | 141                            |
| 2           | 1              | 244                                | 6.3       | 2.2                           | 34.9                     | 37.2                         | 32                      | 21.4                    | 315                            |
| 3           | 2              | 245                                | 7.6       | 0.8                           | 31.9                     | 35.6                         | 34                      | 15.1                    | 358                            |
| 4           | 2              | 247                                | 6.6       | 1.2                           | 35.7                     | 40.7                         | 34                      | 22.2                    | 420                            |
| 5           | 3              | 247                                | 7.5       | 0.5                           | 36.1                     | 48.7                         | 25                      | 23.5                    | 310                            |
| 6           | 4              | 246                                | 7.8       | 0.9                           | 34.9                     | 80.9                         | 35                      | 45.9                    |                                |
| 7           | 5              | 244                                | 7.9       | 0.5                           | 33.2                     | 99.8                         | 38                      | 42.0                    | 503                            |
| 8           | 6              | 244                                | 7.5       | 1.0                           | 31.7                     | 106.5                        | 29                      | 23.6                    | 421                            |
| 9           | 7              | 252                                | 7.3       | 0.7                           | 26.6                     | 76.5                         | 37                      | 40.1                    | 260                            |
| 10          | 7              | 244                                | 7.7       | 0.8                           | 30.5                     | 93.2                         | 37                      | 22.6                    | 305                            |
| 11          | 8              | 245                                | 7.5       | 0.6                           | 32.9                     | 73.7                         | 34                      | 31.2                    | 199                            |
| 12          | 9              | 246                                | 7.5       | 0.4                           | 33.7                     | 71.0                         | 33                      | 18.1                    | 227                            |
| 13          | 10             | 241                                | 7.8       | 0.4                           | 29.1                     | 81.9                         | 38                      | 31.5                    | 280                            |
| 14          | 10             | 246                                | 7.7       | 0.6                           | 31.6                     | 100.1                        | 38                      | 12.9                    | 410                            |

|      |    |     |     |     |      |      |     |      |     |
|------|----|-----|-----|-----|------|------|-----|------|-----|
| 15   | 11 | 248 | 7.6 | 0.7 | 30.7 | 74.7 | 34  | 36.0 | 206 |
| 16   | 11 | 260 | 7.3 | 0.6 | 29.7 | 73.9 | 34  | 10.9 | 244 |
| 17   | 12 | 237 | 8.0 | 0.5 | 30.7 | 76.8 | 33  | 35.2 | 239 |
| 18   | 12 | 260 | 7.3 | 0.6 | 32.2 | 80.1 | 33  | 22.6 | 259 |
| Mean |    | 247 | 7.5 | 0.9 | 32.3 | 72.8 | 34  | 25.9 | 300 |
| SD   |    | 6   | 0.4 | 0.7 | 2.6  | 21.3 | 3.3 | 10.8 | 96  |



**Table S3. ROI Analysis. Related to Figure 4**

| <b>ROI</b> | <b>Grade</b>        | <b>Maximum Lactate Ratio</b> | <b>Time to maximum lactate ratio [s]</b> | <b>Cumulative Lactate Ratio</b> |
|------------|---------------------|------------------------------|------------------------------------------|---------------------------------|
| 1          | High                | 0.28                         | 33                                       | 0.2332                          |
| 2          | Low                 | 0.4313                       | 45                                       | 0.1815                          |
| 3          | Mixed               | 0.4364                       | 45                                       | 0.2602                          |
| 4          | High                | 0.3838                       | 45                                       | 0.1753                          |
| 5          | Benign              | 0.2288                       | 39                                       | 0.1388                          |
| 6          | High                | 0.301                        | 45                                       | 0.1116                          |
| 7          | Low                 | 0.2373                       | 45                                       | 0.0885                          |
| 8          | High                | 0.2449                       | 28                                       | 0.2437                          |
| 9          | Benign              | 0.3218                       | 56                                       | 0.2062                          |
| 10         | High                | 0.4569                       | 56                                       | 0.1862                          |
| 11         | Low                 | 0.4285                       | 45                                       | 0.247                           |
| 12         | (redundant section) |                              |                                          |                                 |
| 13         | Mixed               | 0.6383                       | 40                                       | 0.412                           |
| 14         | Mixed               | 0.5559                       | 40                                       | 0.3044                          |

|    |        |        |                     |        |
|----|--------|--------|---------------------|--------|
| 15 |        |        | (redundant section) |        |
| 16 | High   | 0.2907 | 56                  | 0.1032 |
| 17 | High   | 0.5462 | 56                  | 0.162  |
| 18 | Mixed  | 0.289  | 33                  | 0.2491 |
| 19 |        |        | (redundant section) |        |
| 20 | Benign | 0.1485 | 45                  | 0.1485 |
| 21 | Low    | 0.175  | 45                  | 0.1730 |
| 22 | Mixed  | 0.4268 | 39                  | 0.4200 |
| 23 | Mixed  | 0.442  | 61                  | 0.2419 |
| 24 | High   | 0.3243 | 56                  | 0.2034 |
| 25 |        |        | (redundant section) |        |
| 26 | High   | 0.2831 | 28                  | 0.2213 |
| 27 | Benign | 0.218  | 33                  | 0.1018 |
| 28 | High   | 0.3579 | 45                  | 0.1829 |

---
